# Supplementary material
Source: HighWire-hosted journal article supplement (https://erj.ersjournals.com/content/58/4/2100979)
Supplement: inline-supplementary-material-1 [file inline-supplementary-material-1.pdf]

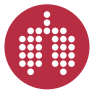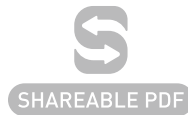

# Steroid use in elderly critically ill COVID-19 patients

Christian Jung <sup>1</sup>, Bernhard Wernly <sup>2</sup>, Jesper Fjølner <sup>3</sup>, Raphael Romano Bruno <sup>1</sup>, David Dudzinski <sup>4</sup>, Antonio Artigas <sup>5</sup>, Bernardo Bollen Pinto <sup>6</sup>, Joerg C. Schefold <sup>7</sup>, Georg Wolff <sup>1</sup>, Malte Kelm <sup>1</sup>, Michael Beil <sup>8</sup>, Sviri Sigal <sup>8</sup>, Peter Vernon van Heerden <sup>9</sup>, Wojciech Szczeklik <sup>10</sup>, Miroslaw Czuczwar <sup>11</sup>, Muhammed Elhadi <sup>12</sup>, Michael Joannidis <sup>13</sup>, Sandra Oeyen <sup>14</sup>, Tilemachos Zafeiridis <sup>15</sup>, Brian Marsh <sup>16</sup>, Finn H. Andersen <sup>17,18</sup>, Rui Moreno <sup>19</sup>, Maurizio Cecconi <sup>20</sup>, Susannah Leaver <sup>21</sup>, Ariane Boumendil <sup>22,23</sup>, Dylan W. De Lange <sup>24</sup>, Bertrand Guidet <sup>22,23</sup> and Hans Flaatten <sup>25,26</sup> and the COVIP study group

<sup>1</sup>Medical Faculty, Dept of Cardiology, Pulmonology and Vascular Medicine, Heinrich-Heine-University Duesseldorf, Duesseldorf, Germany. <sup>2</sup>Dept of Anaesthesiology, Perioperative Medicine and Intensive Care Medicine, Paracelsus Medical University, Salzburg, Austria. <sup>3</sup>Dept of Intensive Care, Aarhus University Hospital, Aarhus, Denmark. <sup>4</sup>Cardiac Intensive Care Unit, Massachusetts General Hospital, Boston, MA, USA. <sup>5</sup>Dept of Intensive Care Medicine, CIBER Enfermedades Respiratorias, Corporacion Sanitaria Universitaria Parc Tauli, Autonomous University of Barcelona, Sabadell, Spain. <sup>6</sup>Dept of Acute Medicine, Geneva University Hospitals, Geneva, Switzerland. <sup>7</sup>Dept of Intensive Care Medicine, Inselspital, Universitätsspital, University of Bern, Bern, Switzerland. <sup>8</sup>Dept of Medical Intensive Care, Hadassah Medical Center and Faculty of Medicine, Hebrew University of Jerusalem, Jerusalem, Israel. <sup>9</sup>Dept of Anesthesia, Intensive Care and Pain Medicine, Hadassah Medical Center and Faculty of Medicine, Hebrew University of Jerusalem, Jerusalem, Israel. <sup>10</sup>Center for Intensive Care and Perioperative Medicine, Jagiellonian University Medical College, Krakow, Poland. <sup>11</sup>2nd Dept of Anesthesiology and Intensive Care, Medical University of Lublin, Lublin, Poland. <sup>12</sup>Faculty of Medicine, University of Tripoli, Tripoli, Libya. <sup>13</sup>Division of Intensive Care and Emergency Medicine, Dept of Internal Medicine, Medical University Innsbruck, Innsbruck, Austria. <sup>14</sup>Dept of Intensive Care 1K12IC, Ghent University Hospital, Ghent, Belgium. <sup>15</sup>Intensive Care Unit General Hospital of Larissa, Larissa, Greece. <sup>16</sup>Mater Misericordiae University Hospital, Dublin, Ireland. <sup>17</sup>Dept Of Anaesthesia and Intensive Care, Ålesund Hospital, Ålesund, Norway. <sup>18</sup>Dept of Circulation and Medical Imaging, Norwegian University of Science and Technology, Trondheim, Norway. <sup>19</sup>Unidade de Cuidados Intensivos Neurocríticos e Trauma, Hospital de São José, Centro Hospitalar Universitário de Lisboa Central, Faculdade de Ciências Médicas de Lisboa, Nova Médical School, Lisbon, Portugal. <sup>20</sup>Dept of Anaesthesia IRCCS, Instituto Clínico Humanitas, Humanitas University, Milan, Italy. <sup>21</sup>General Intensive Care, St George's University Hospitals NHS Foundation Trust, London, UK. <sup>22</sup>Sorbonne Universités, UPMC Univ Paris 06, INSERM, UMR\_S 1136, Institut Pierre Louis d'Epidémiologie et de Santé Publique, Equipe: épidémiologie hospitalière qualité et organisation des soins, Paris, France. <sup>23</sup>Assistance Publique - Hôpitaux de Paris, Hôpital Saint-Antoine, Service de réanimation médicale, Paris, France. <sup>24</sup>Dept of Intensive Care Medicine, University Medical Center, University Utrecht, Utrecht, The Netherlands. <sup>25</sup>Dept of Clinical Medicine, University of Bergen, Bergen, Norway. <sup>26</sup>Dept of Anaesthesia and Intensive Care, Haukeland University Hospital, Bergen, Norway.

Christian Jung ([christian.jung@med.uni-duesseldorf.de](mailto:christian.jung@med.uni-duesseldorf.de))

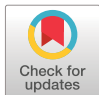

Shareable abstract (@ERSpublications)

This secondary analysis of the COVIP study shows a higher 30-day mortality in critically ill elderly COVID-19 patients who received steroids as part of their treatment @cjungMD <https://bit.ly/3xdyEur>

Cite this article as: Jung C, Wernly B, Fjølner J, et al. Steroid use in elderly critically ill COVID-19 patients. *Eur Respir J* 2021; 58: 2100979 [DOI: 10.1183/13993003.00979-2021].

This single-page version can be shared freely online.

Copyright ©The authors 2021.

This version is distributed under the terms of the Creative Commons Attribution Non-Commercial Licence 4.0. For commercial reproduction rights and permissions contact [permissions@ersnet.org](mailto:permissions@ersnet.org)

Received: 6 April 2021  
Accepted: 2 June 2021

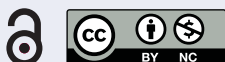

To the Editor:

More than a year after the onset of the severe acute respiratory syndrome coronavirus 2 (SARS-CoV-2) pandemic, treating patients with coronavirus disease 2019 (COVID-19) remains a challenge. In contrast to the rapid development of effective vaccines against SARS-CoV-2, the development of specific and effective therapeutics against COVID-19 remains largely unresolved.
